# Supplementary material
Source: publisher figshare collection journal article supplement (https://tandf.figshare.com/articles/dataset/_/24596468)
Supplement: Supplementary file 1 [file 1]

**ABOUT THE AUTHORS**

Margaret O. Edet (MSc) graduated from the Department of Food Science and Technology, University of Uyo, Nigeria. She is passionate about using underutilized indigenous crops, and discovering new and efficient techniques that improve food processing and quality.

Florence A. Bello (PhD) is a senior lecturer and researcher in the Department of Food Science and Technology, University of Uyo, Nigeria, and is currently on a Sabbatical appointment at the University of Calabar, Nigeria. Her research focuses on applying improved postharvest handling and processing technologies to reduce food losses and waste, and valorization of food processing by-products for food product development.

Babatunde S. Oladeji (PhD) is a senior lecturer and an acting Head of the Department of Food Science and Technology, University of Calabar, Nigeria. He is a dedicated researcher and consultant with a passion for quality research in the development of novel food products capable of alleviating the problem of protein energy malnutrition.
